# Supplementary material for: Hexagonal supramolecular organic conductors based on diiodo(pyrazino)tetraselenafulvalene: high yield recovery of the neutral π-donor by a simple chemical reaction
Source: Royal Society of Chemistry journal article supplement (doi:10.1039/b611010j), 2006-01-01

Electronic Supplementary Information (ESI)

*Hexagonal supramolecular organic conductors based on diiodo(pyrazino)tetraselenafulvalene: high yield recovery of the neutral  $\pi$ -donor by a simple chemical reaction*

Tatsuro Imakubo,\* Megumi Kibune, Hiroko Yoshino, Takashi Shirahata and Kenji Yoza

\*Imakubo Initiative Research Unit, RIKEN, 2-1 Hirosawa, Wako, Saitama 351-0198, Japan.  
E-mail: imakubo@riken.jp

Black and white illustration of Fig. 4  
(for monochrome printing)

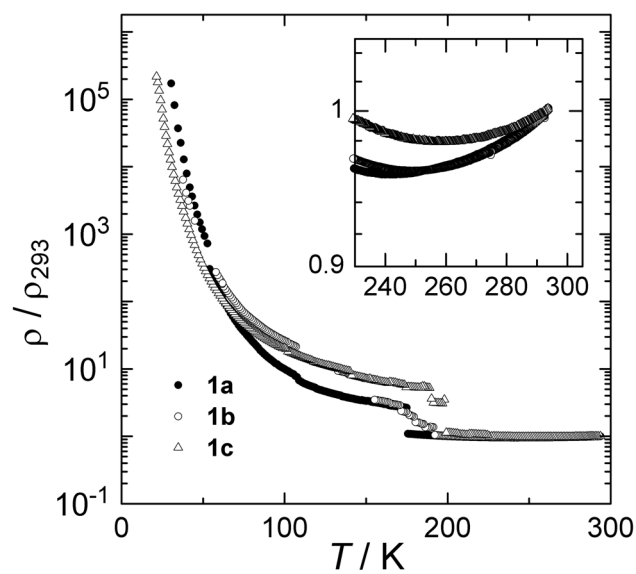

Supplement: b611010j.pdf [file b611010j.pdf]
